# Supplementary material for: Temperature-dependent self-assembly of NiO/Co3O4composites for supercapacitor electrodes with good cycling performance: from nanoparticles to nanorod arrays
Source: Royal Society of Chemistry journal article supplement (doi:10.1039/c4ra14153a), 2014-11-27
Supplement: c4ra14153a1.pdf [file c4ra14153a1.pdf]

## Electronic Supplementary Information (ESI)

Temperature-dependent self-assembly of NiO/Co<sub>3</sub>O<sub>4</sub> composites  
for supercapacitor electrodes with good cycling performance:  
from nanoparticles to nanorod arrays

Kuaibing Wang,<sup>a,\*</sup> Zhiyang Zhang,<sup>b</sup> Xiaobo Shi,<sup>c</sup> Hongju Wang,<sup>b</sup> Yanan Lu,<sup>b</sup> Xiaoyan Ma<sup>b</sup>

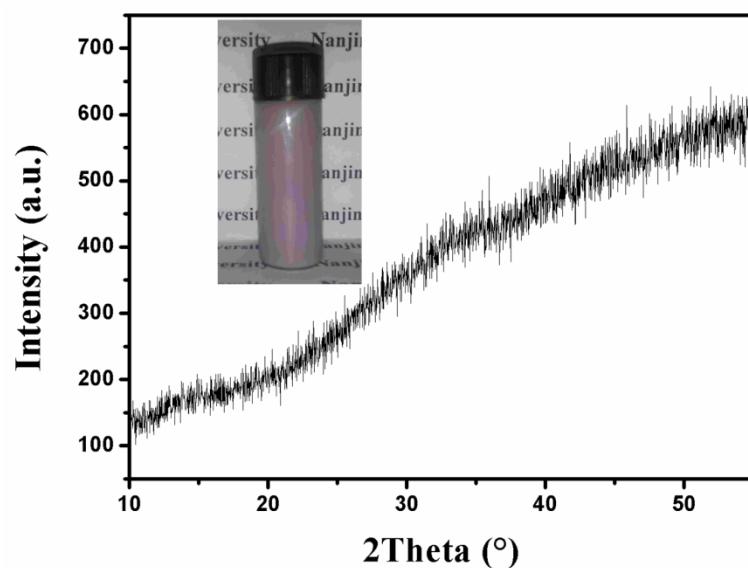

**Fig. S1** XRD pattern of the as-synthesized coordination polymer particles precursor; inset: the photograph of the purple precursor.

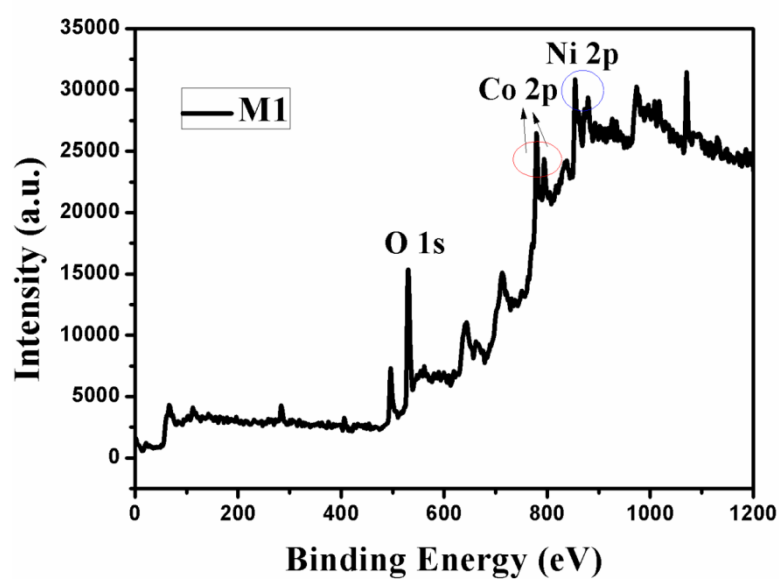

**Fig. S2** XPS spectra of the survey scan of hybrid NiO/Co<sub>3</sub>O<sub>4</sub> nanoparticles (M1).

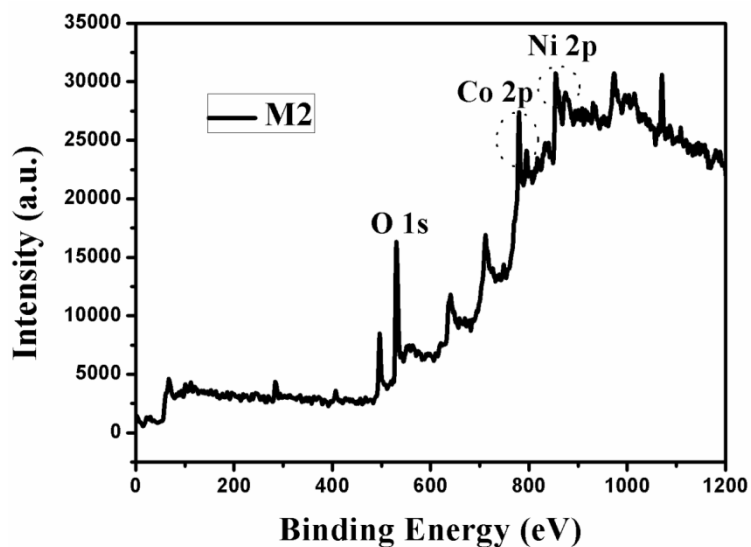

Fig. S3 XPS spectra of the survey scan of hybrid NiO/Co<sub>3</sub>O<sub>4</sub> composites (M2).

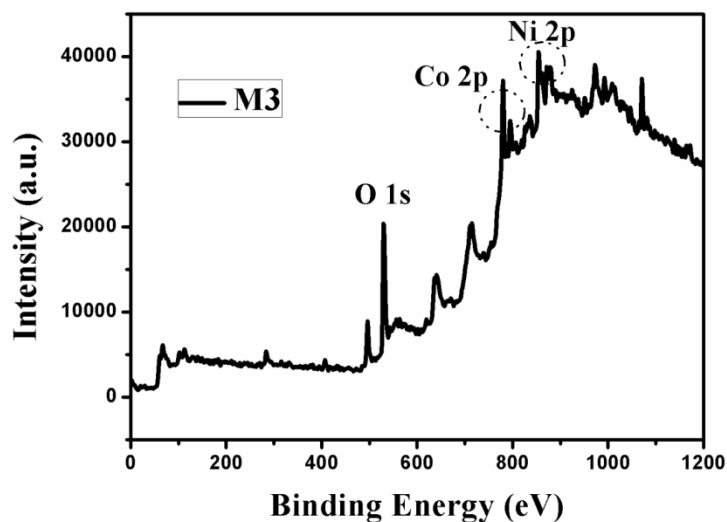

Fig. S4 XPS spectra of the survey scan of hybrid NiO/Co<sub>3</sub>O<sub>4</sub> nanorod arrays (M3).

Table S1 XPS peak positions and atomic compositions for NiO/Co<sub>3</sub>O<sub>4</sub> composites

| Samples | Co 2p <sub>3/2</sub> (eV) | Ni 2p <sub>3/2</sub> (eV) | XPS Co/Ni (At% ratio) |
|---------|---------------------------|---------------------------|-----------------------|
| M1      | 779                       | 853.6                     | 0.935                 |
| M2      | 779.3                     | 853.6                     | 0.953                 |
| M3      | 779.3                     | 853.5                     | 0.968                 |
